# Supplementary material
Source: PubMed Central journal article supplement (PMC3428776)
Supplement: supp_pp.112.200964_200964Suppl_Figs.pdf [file supp_pp.112.200964_200964Suppl_Figs.pdf]

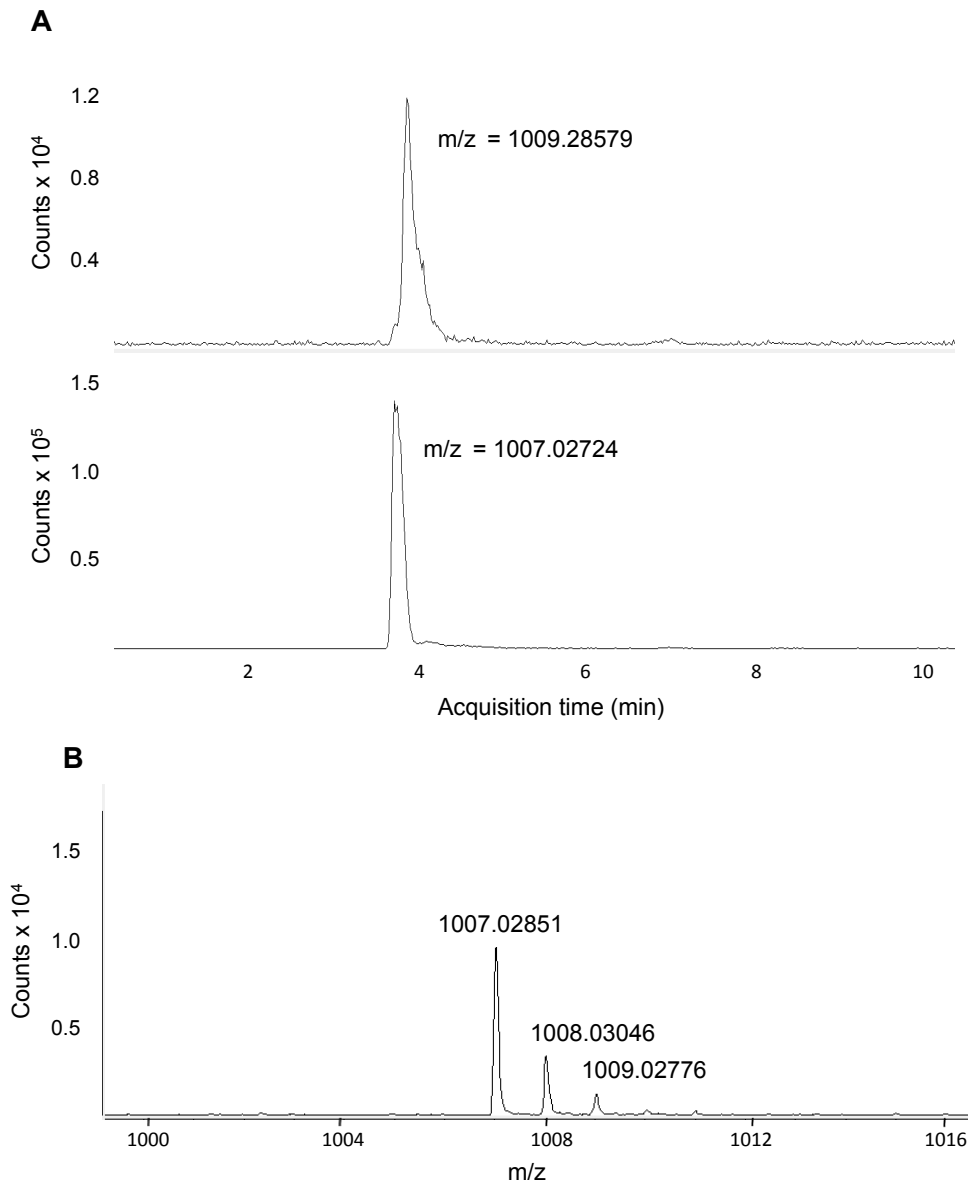

**Supplemental Figure S1.** LC-MS analysis of GUX1 reaction product. A, HPLC elution profiles of product from reaction using purified GUX1. Top, profile of the sodium adduct of glucurono-xylohexaose alone ( $m/z = 1009.28579$ ). Bottom, profile of the unknown compound with  $m/z = 1007.02724$ . B, mass spectrum of a GlcAT control reaction that did not include purified GUX1, showing the contaminant peak at 1007.02851 and its isotope peaks.

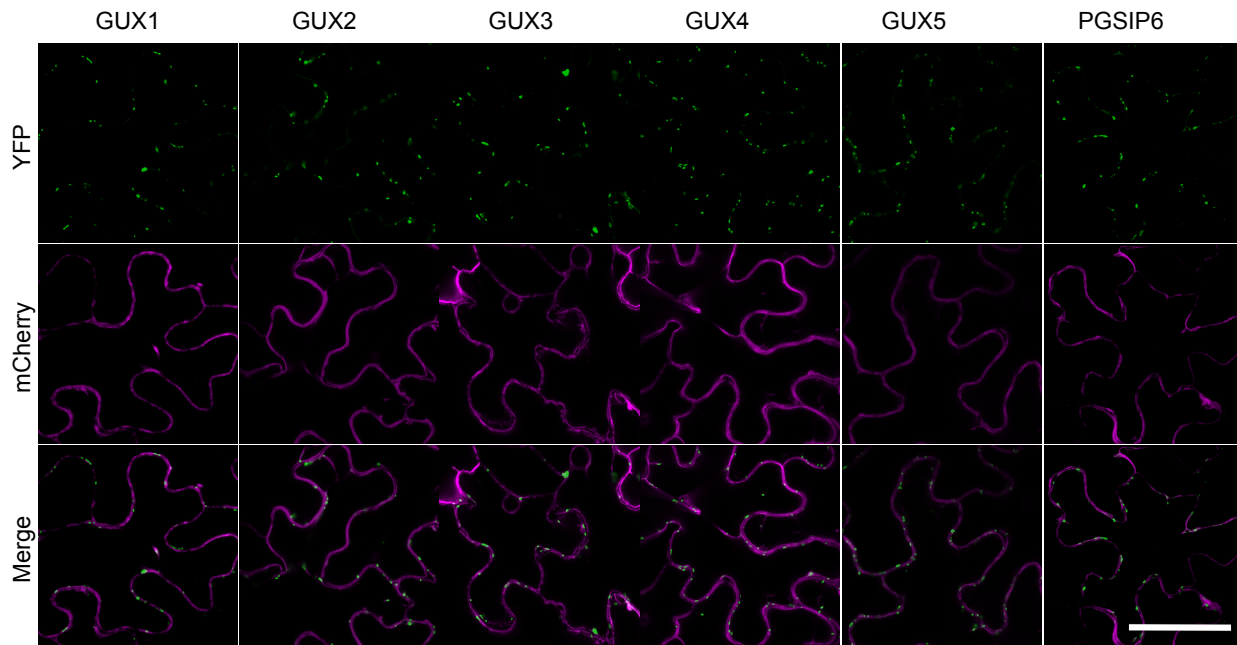

**Supplemental Figure S2.** Subcellular localizations of the GUX1 – GUX5 and PGSIP6 proteins. Single-plane confocal micrographs of the proteins fused with C-terminal YFP (top row), the plasma membrane marker AtPIP2-mCherry (middle row), and merged YFP and mCherry channels (bottom row). Bar = 100  $\mu$ m.
